# Supplementary material for: Detection of heterocyclic amine (PhIP) by fluorescently labelled cucurbit[7]uril
Source: Royal Society of Chemistry journal article supplement (doi:10.1039/d2an00495j), 2022-01-01
Supplement: d2an00495j1.pdf [file d2an00495j1.pdf]

## Supporting Information

### Detection of Heterocyclic Amine (PhIP) by Fluorescently Labelled Cucurbit[7]uril

Lili Sun<sup>a</sup>, Zejiang Wang<sup>a</sup>, Juan Hou<sup>a</sup>, Guozhen Fang<sup>a</sup>, Jifeng Liu<sup>\*a</sup>, Shuo Wang<sup>\*a,b</sup>

State Key Laboratory of Food Nutrition and Safety, Key Laboratory of Food Quality and Health of Tianjin, College of Food Science and Engineering, Tianjin University of Science and Technology, Tianjin, 300457, PR China.

Research Center of Food Science and Human Health, School of Medicine, Nankai University, Tianjin, 300071, PR China.

Jifeng Liu, Email: liujifeng111@gmail.com. Shuo Wang, Email: wangshuo@nankai.edu.cn

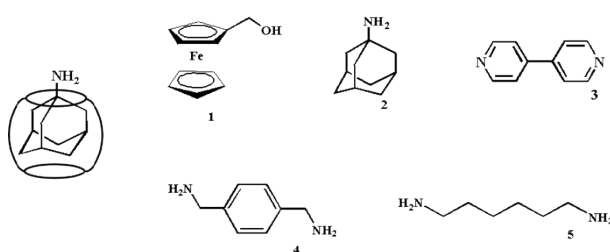

**Figure. S1.** The structure of the molecule that binds to CB[7].

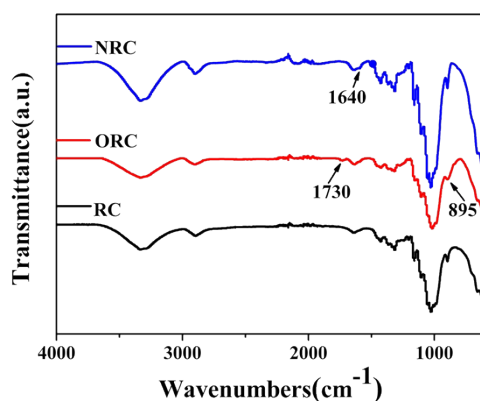

**Figure. S2.** Infrared spectra of regenerate cellulose membrane (RC), oxidized cellulose membrane (ORC) and PhIP molecules attached membrane.

**Table S1.** An overview on recently reported methods for the determination of heterocyclic amine (PhIP)

| Techniques/<br>materials used                    | Limit of detection/<br>merit                             | References |
|--------------------------------------------------|----------------------------------------------------------|------------|
| UPLC-MS/                                         | 0.013 ng/g<br>Complicate preprocessing<br>and instrument | [51]       |
| UHPLC-QE / MS                                    | 0.1 ng/mL<br>Complicate preprocessing<br>and instrument  | [52]       |
| LC-ECD                                           | 2 ng/g<br>Complicate instrument                          | [53]       |
| Fluorescence<br>Immunoassay                      | 0.01 ng/ml<br>Complicate immunoassay<br>Materials        | [54]       |
| Host-guest recognition<br>fluorescence detection | 0.224 ng/g<br>Simple, low cost, in situ detection        | This work  |

51. S. H. Shan, Y. J. Ma, C. L. Sun, X. L. Guo, H. Zheng, X. B. Xu, L. Qin and J. N. Hu, *Food Chem.*, 2021, 337, 127630.
52. Y. S. Huang, C. Li, H. Y. Hu, Y. T. Wang, M. Y. Shen, S. P. Nie, J. Chen, M. M. Zeng and M. Y. Xie, *J. Agric. Food Chem.*, 2019, 67, 5017-5025.
53. E. Bermudo, V. R. Calero, L. Puigmou and M. T. Galceran, *Anal. Chim. Acta*, 2005, 536, 83-90.
54. W. Sheng, B. Zhang, Q. Zhao, S. Wang and Y. Zhang, *J. Agric. Food Chem.*, 2020, 68, 15501-15508.
